# Supplementary material
Source: PubMed Central journal article supplement (PMC6740193)
Supplement: ao9b01774_si_001.pdf [file ao9b01774_si_001.pdf]

## Supporting Information

### **Synthesis and antimicrobial evaluation of $\gamma$ -borono phosphonate compounds in *Escherichia coli* and *Mycobacterium smegmatis***

Giulia Mancini, Maria Bouda, James M. Gamrat and John W. Tomsho\*

Department of Chemistry & Biochemistry, University of the Sciences in Philadelphia, 600 S.

43rd Street, Philadelphia, PA 19104, USA

| <b>Page Number</b> | <b>Item</b>                                                             |
|--------------------|-------------------------------------------------------------------------|
| S3                 | Figure S1. <sup>1</sup> H-NMR spectra for compound <b>3</b>             |
| S4                 | Figure S2. <sup>13</sup> C-NMR spectra for compound <b>3</b>            |
| S5                 | Figure S3. <sup>1</sup> H-NMR spectra for compound <b>5</b>             |
| S6                 | Figure S4. <sup>13</sup> C-NMR spectra for compound <b>5</b>            |
| S7                 | Figure S5. qNMR spectra for compound <b>5</b>                           |
| S8                 | Figure S6. <sup>1</sup> H-NMR spectra for compound <b>6</b>             |
| S9                 | Figure S7. <sup>13</sup> C-NMR spectra for compound <b>6</b>            |
| S10                | Figure S8. qNMR spectra for compound <b>6</b>                           |
| S11                | Figure S9. <sup>1</sup> H-NMR spectra for compound <b>4</b>             |
| S11                | Figure S10. <sup>13</sup> C-NMR spectra for compound <b>4</b>           |
| S12                | Figure S11. qNMR spectra for compound <b>4</b>                          |
| S12                | Figure S12. <sup>31</sup> P-NMR spectra for compound <b>4</b>           |
| S13                | Figure S13. <sup>11</sup> B-NMR spectra for compound <b>4</b>           |
| S13                | Figure S14. COSY spectra for compound <b>4</b>                          |
| S14                | Figure S15. HSQC spectra for compound <b>4</b>                          |
| S15                | Figure S16. <sup>1</sup> H-NMR spectra for compound <b>7</b>            |
| S16                | Figure S17. <sup>13</sup> C-NMR spectra for compound <b>7</b>           |
| S17                | Figure S18. qNMR spectra for compound <b>7</b>                          |
| S18                | Figure S19. IPP chemical rescue of <i>E. coli</i> for compound <b>6</b> |

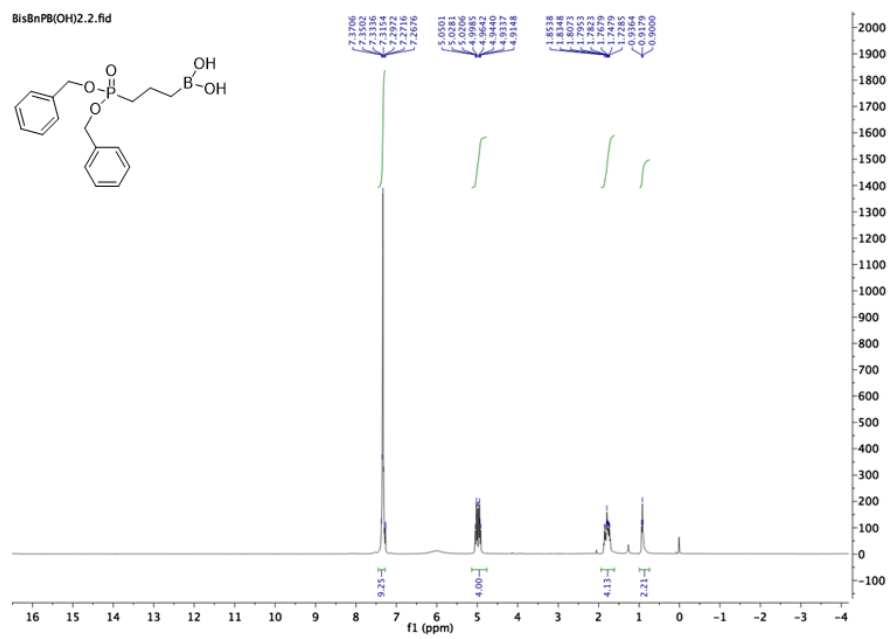

**Figure S1.**  $^1\text{H-NMR}$  spectra for compound **3**

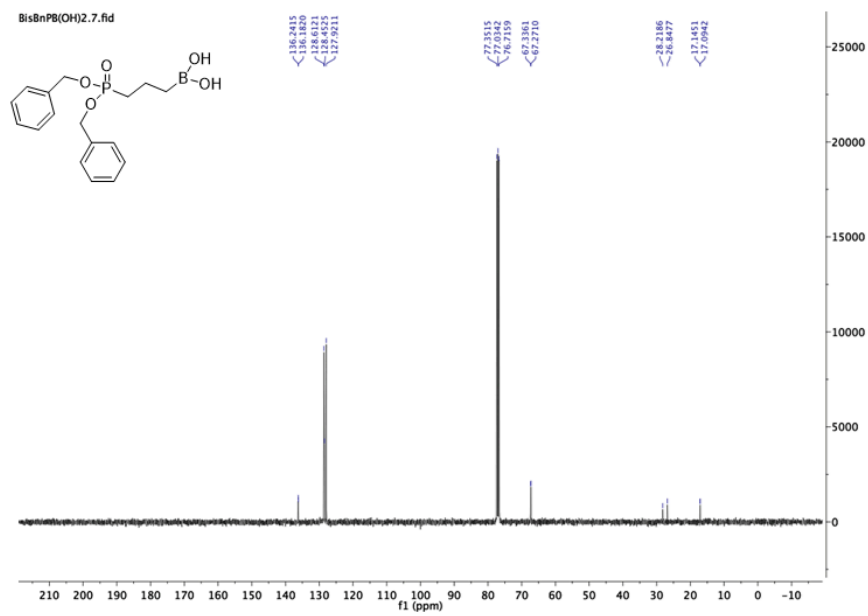

**Figure S2.**  $^{13}\text{C}$ -NMR spectra for compound **3**

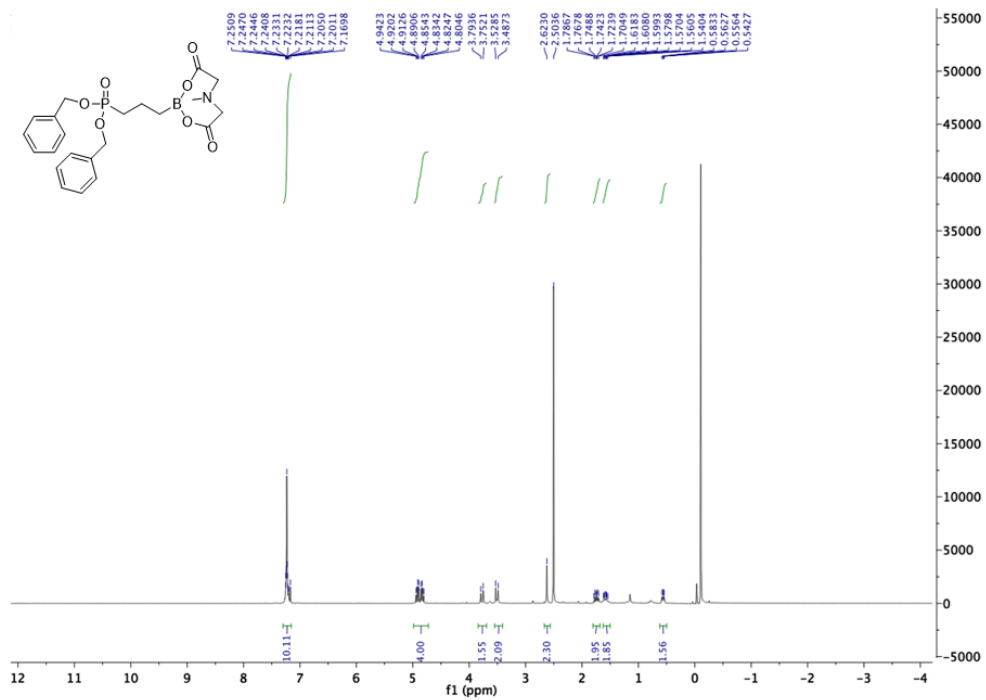

**Figure S3.**  $^1\text{H-NMR}$  spectra for compound **5**





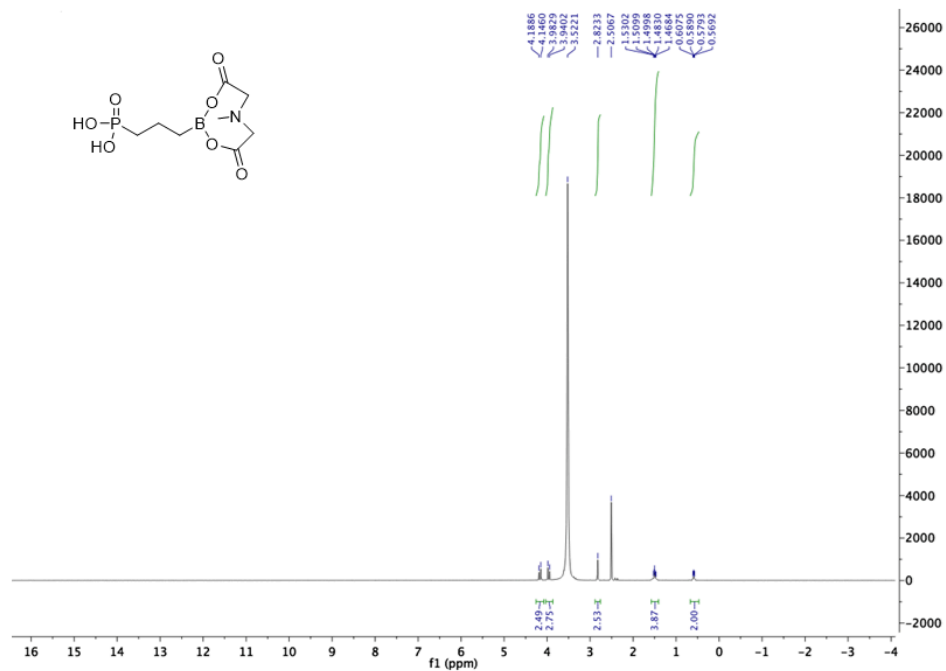

**Figure S6.**  $^1\text{H-NMR}$  spectra for compound **6**



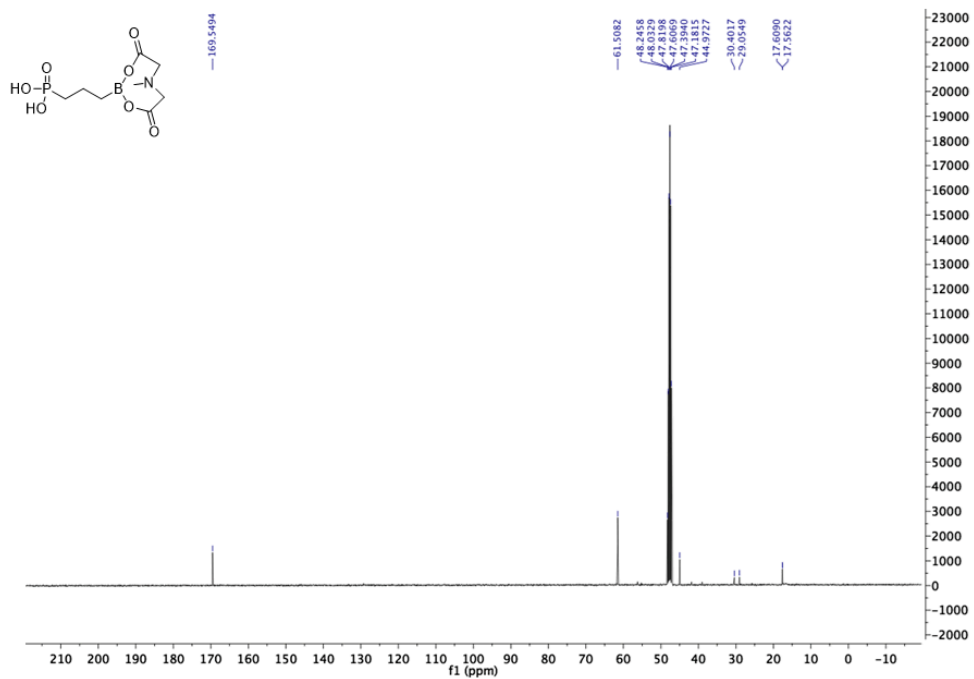

Figure S7.  $^{13}\text{C-NMR}$  spectra for compound 6

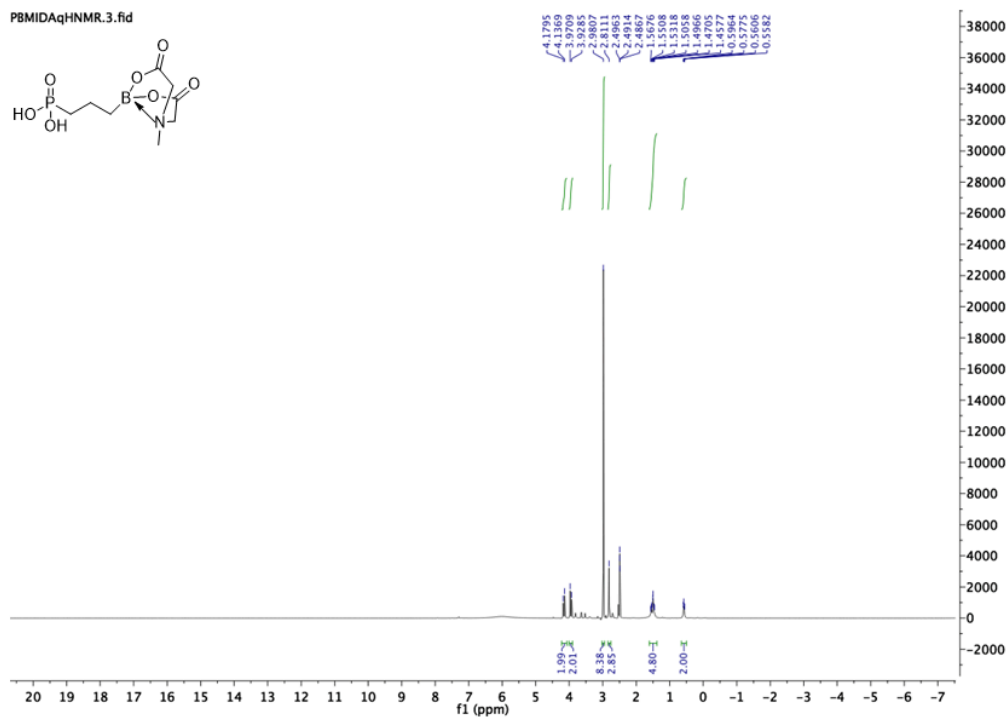

**Figure S8.** qNMR compound 6, internal standard DMSO<sub>2</sub>. Purity 98%.

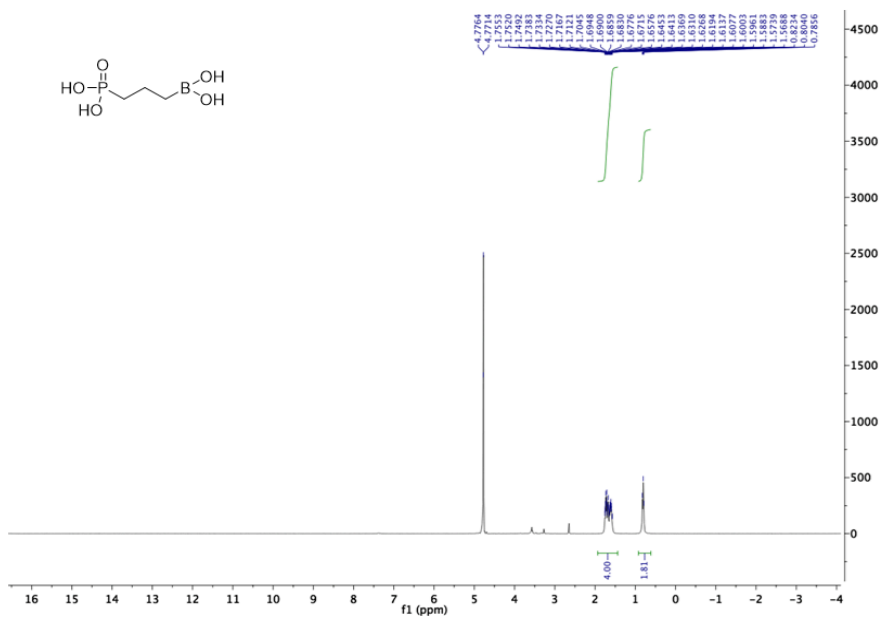

Figure S9. <sup>1</sup>H-NMR spectra for compound 4

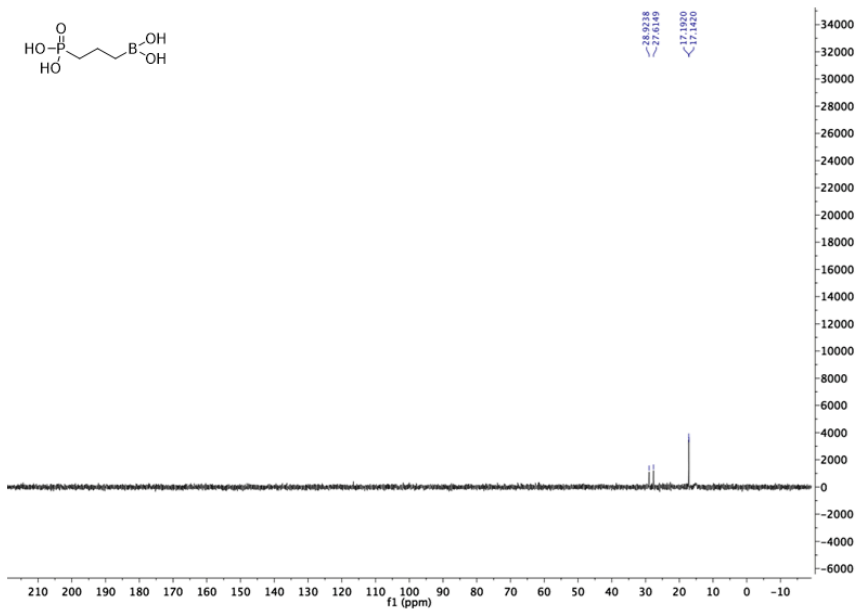

Figure S10. <sup>13</sup>C-NMR spectra for compound 4



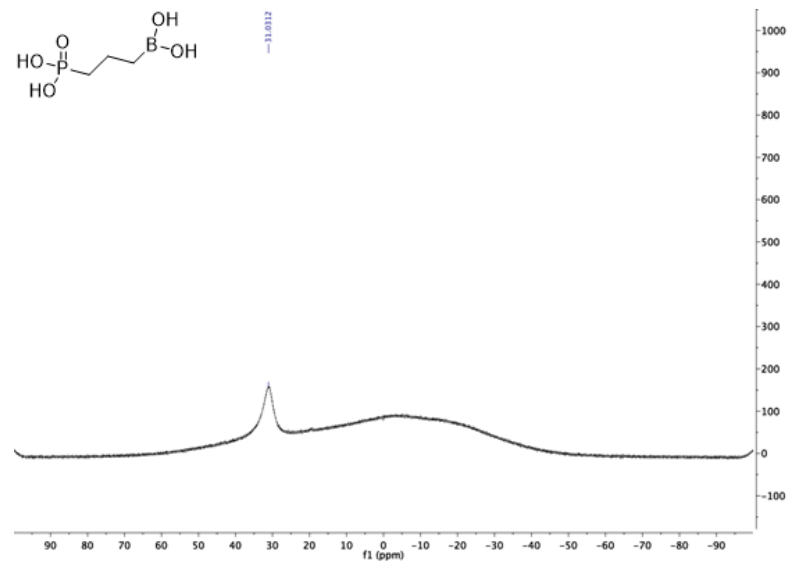

**Figure S13.**  $^{11}\text{B}$ -NMR spectra for compound 4

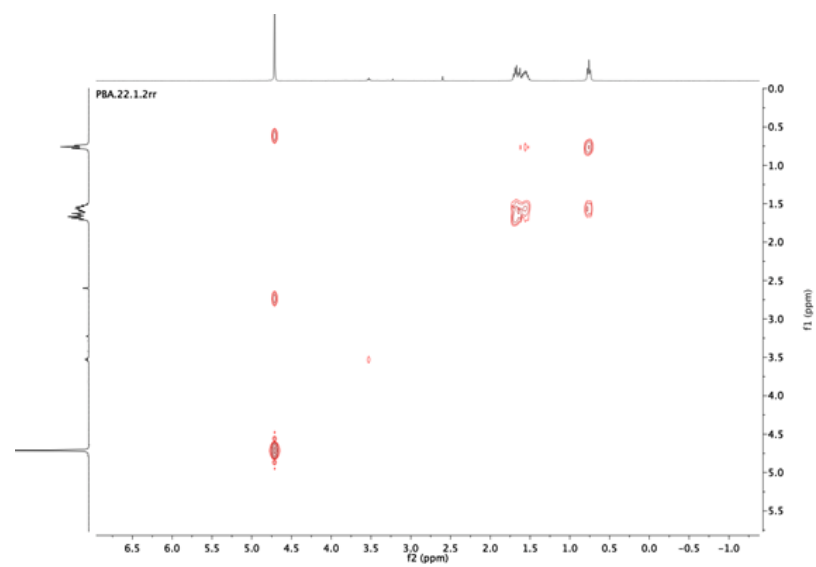

**Figure S14.** COSY NMR for compound 4

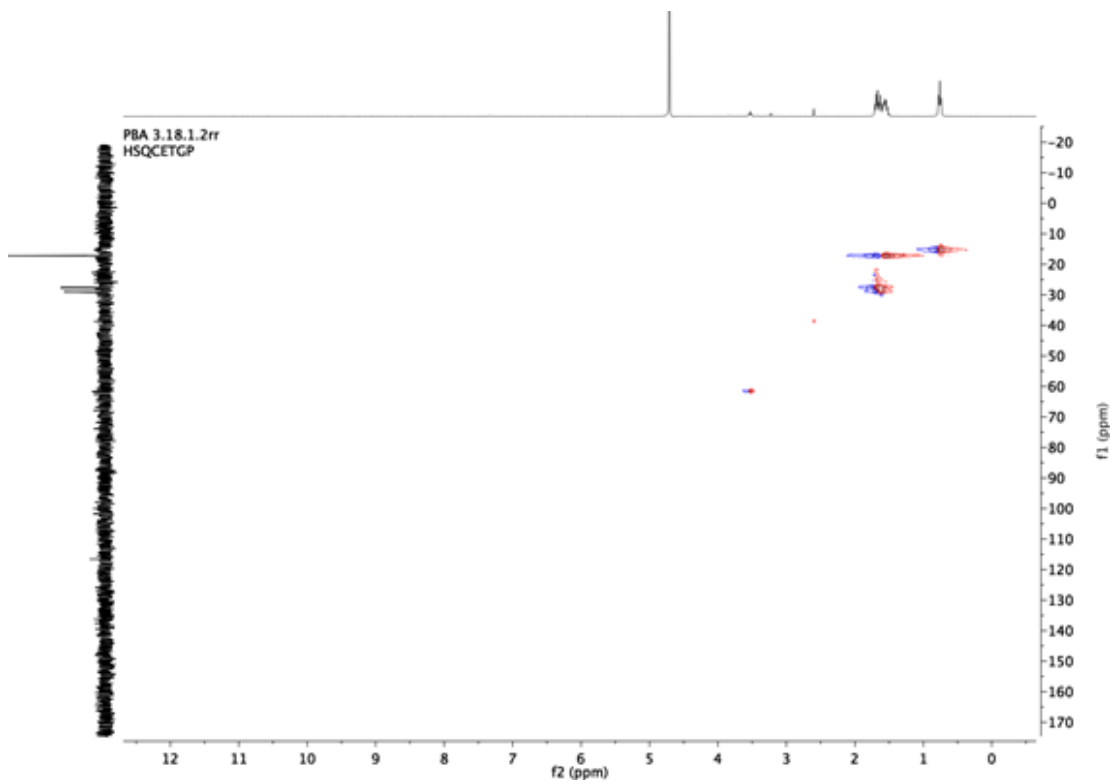

Figure S15. HSQC for compound 4

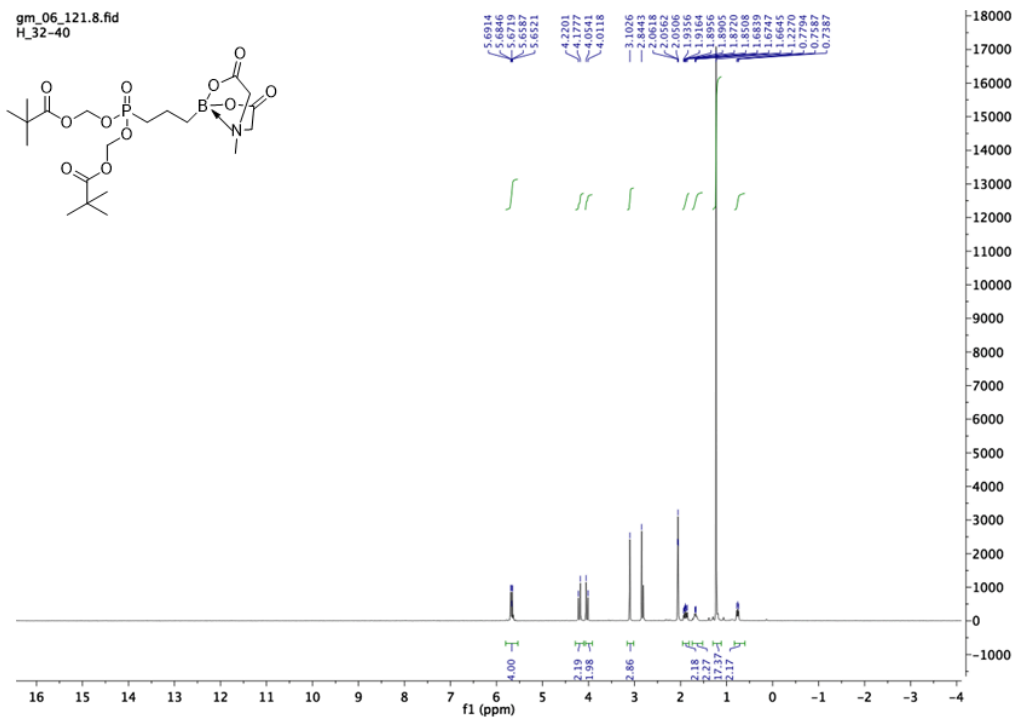

Figure S16. <sup>1</sup>H-NMR spectra for compound 7

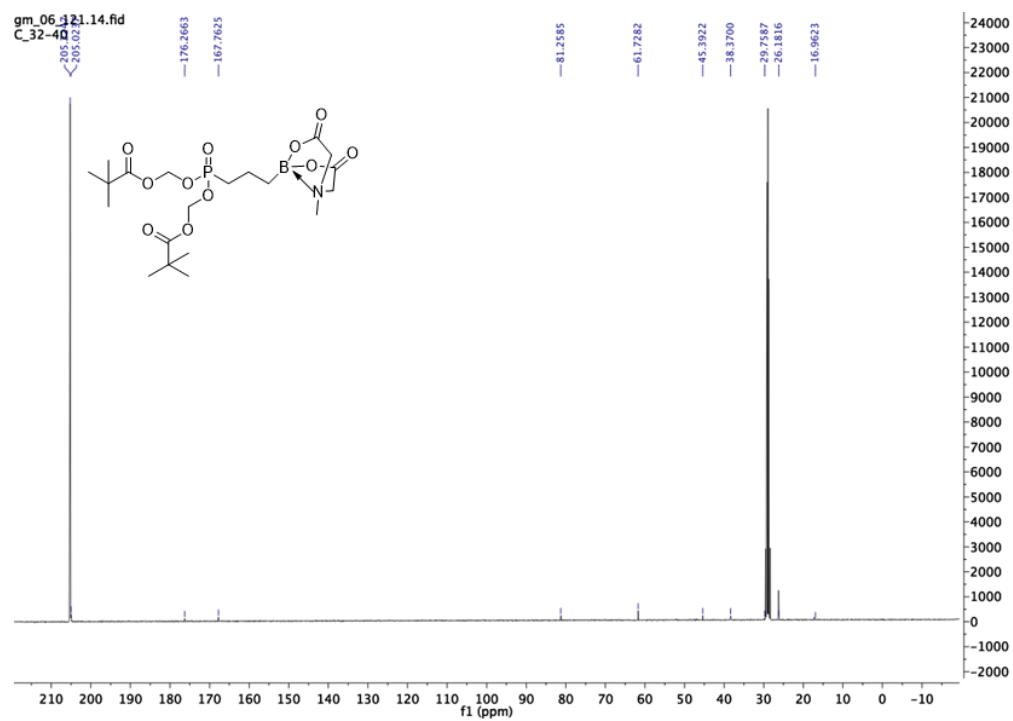

Figure S17.  $^{13}\text{C}$ -NMR spectra for compound 7



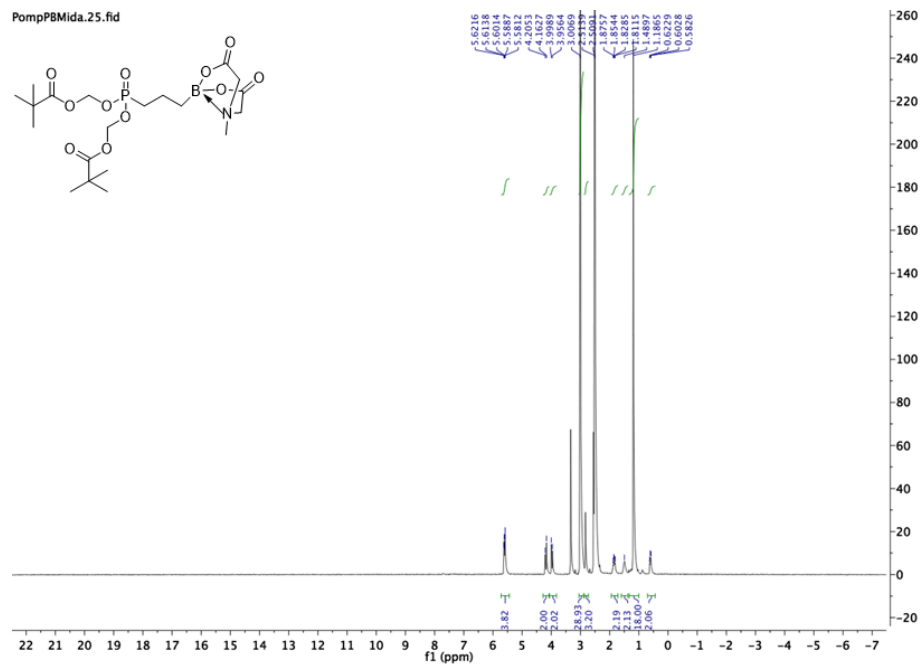

**Figure S18.** qNMR compound 7, internal standard DMSO<sub>2</sub>. Purity 98%

## IPP chemical rescue of *E. coli* growth inhibition for compound 6

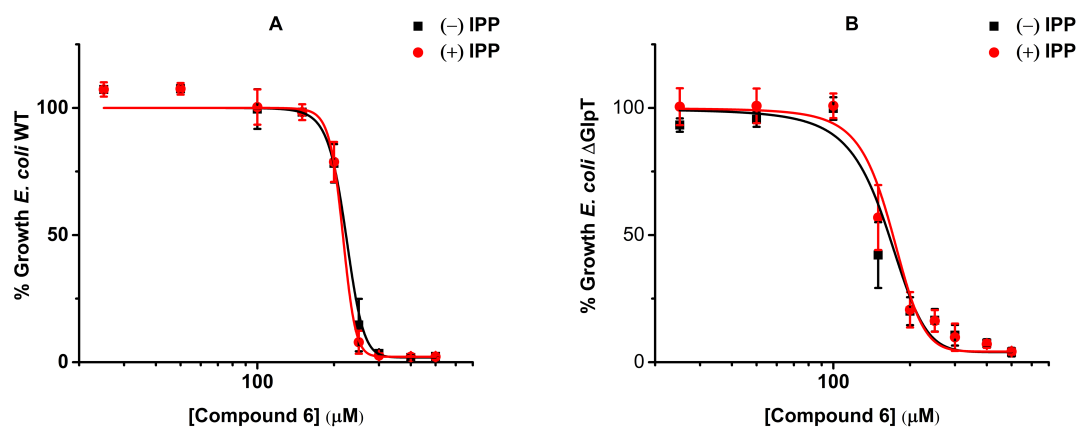

**Figure S19.** IPP chemical rescue of *E. coli* growth inhibition when treated with compound 6. A) and B) *E. coli* WT and *E. coli*  $\Delta$ GlpT were treated with different concentrations of 6 for 18 h with and without the addition of 125  $\mu$ M IPP in LB media. (n = 3).
